# Supplementary material
Source: PubMed Central journal article supplement (PMC8100964)

Figure S1. Quantification of western blot results. (A) Protein expression levels of RASA1, p21, and Ras-GTP in SW480 or SW480/OXA cells transfected with miR-188-5p mimics or inhibitors. n=3. \* $P < 0.01$ , \*\* $P < 0.001$  vs. NC mimics; ## $P < 0.01$ , ### $P < 0.001$  vs. NC inhibitor. (B) Protein expression levels of RASA1, p21, and Ras-GTP in SW480 or SW480/OXA cells transfected with RASA1 plasmid or RASA1 siRNA. n=3. \* $P < 0.01$ , \*\* $P < 0.001$  vs. vector; ## $P < 0.01$ , ### $P < 0.001$  vs. siNC group. (C) RASA1, p21, and Ras-GTP protein expression levels in SW480 or SW480/OXA cells following co-transfection with RASA1 plasmid or RASA1 siRNA and with miR-188-5p or inhibitor. n=3. \* $P < 0.01$ , \*\* $P < 0.001$  vs. mimics + vector group; # $P < 0.05$ , ## $P < 0.01$ , ### $P < 0.001$  vs. inhibitor + siNC group. miR, microRNA; oxa, oxaliplatin; RASA1, Ras GTPase-activating protein 1; NC, negative control; siNC, siRNA negative control.

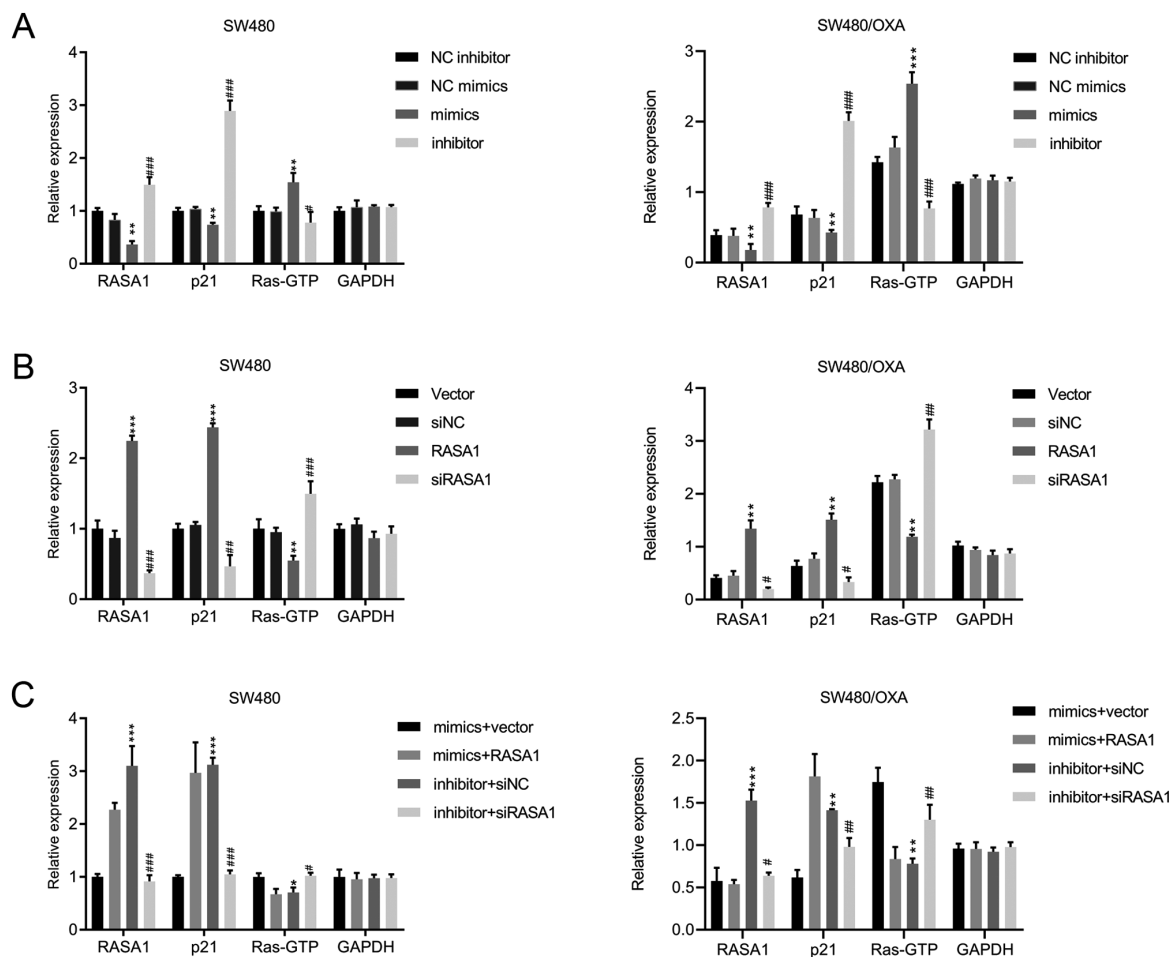

Figure S2. Quantification of Hoechst 33342 staining following different transfection conditions. (A) Hoechst 33342 staining in SW480 or SW480/OXA cells transfected with miR-188-5p mimics or inhibitor. \* $P < 0.05$ , \*\*\* $P < 0.001$  vs. NC mimics; # $P < 0.05$ , ### $P < 0.001$  vs. NC inhibitor. (B) Hoechst 33342 staining in SW480 or SW480/OXA cells transfected with RASA1 overexpression plasmid or RASA1 siRNA. \* $P < 0.05$ , \*\*\* $P < 0.001$  vs. vector; # $P < 0.05$ , ### $P < 0.001$  vs. siNC group. (C) Hoechst 33342 staining in SW480 or SW480/OXA cells following co-transfection with RASA1 plasmid or RASA1 siRNA and with miR-188-5p or inhibitor. \*\*\* $P < 0.001$  vs. mimics + vector group; ### $P < 0.001$  vs. inhibitor + siNC group. miR, microRNA; oxa, oxaliplatin; RASA1, Ras GTPase-activating protein 1; NC, negative control; siNC, siRNA negative control.

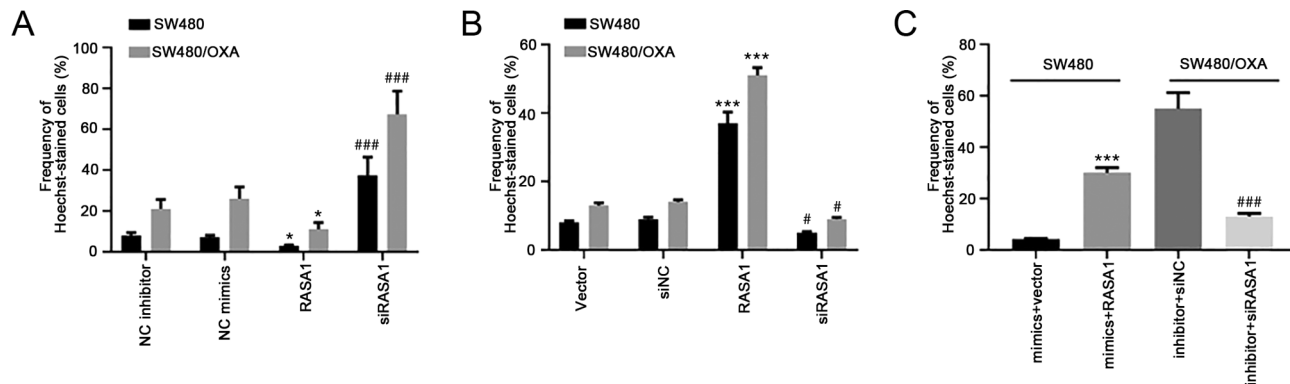

Supplement: Supplementary_Data.pdf [file Supplementary_Data.pdf]
